# Supplementary material for: AR-mTOR-SRF Axis Regulates HMMR Expression in Human Prostate Cancer Cells
Source: PubMed Central journal article supplement — Biomol Ther (Seoul). 2021 Jun 8;29(6):667–77. doi: 10.4062/biomolther.2021.040 (PMC8551732; doi:10.4062/biomolther.2021.040), 2021-06-08
Supplement: bt-29-6-667-supple.pdf [file bt-29-6-667-supple.pdf]

# Supplementary Figure S1.

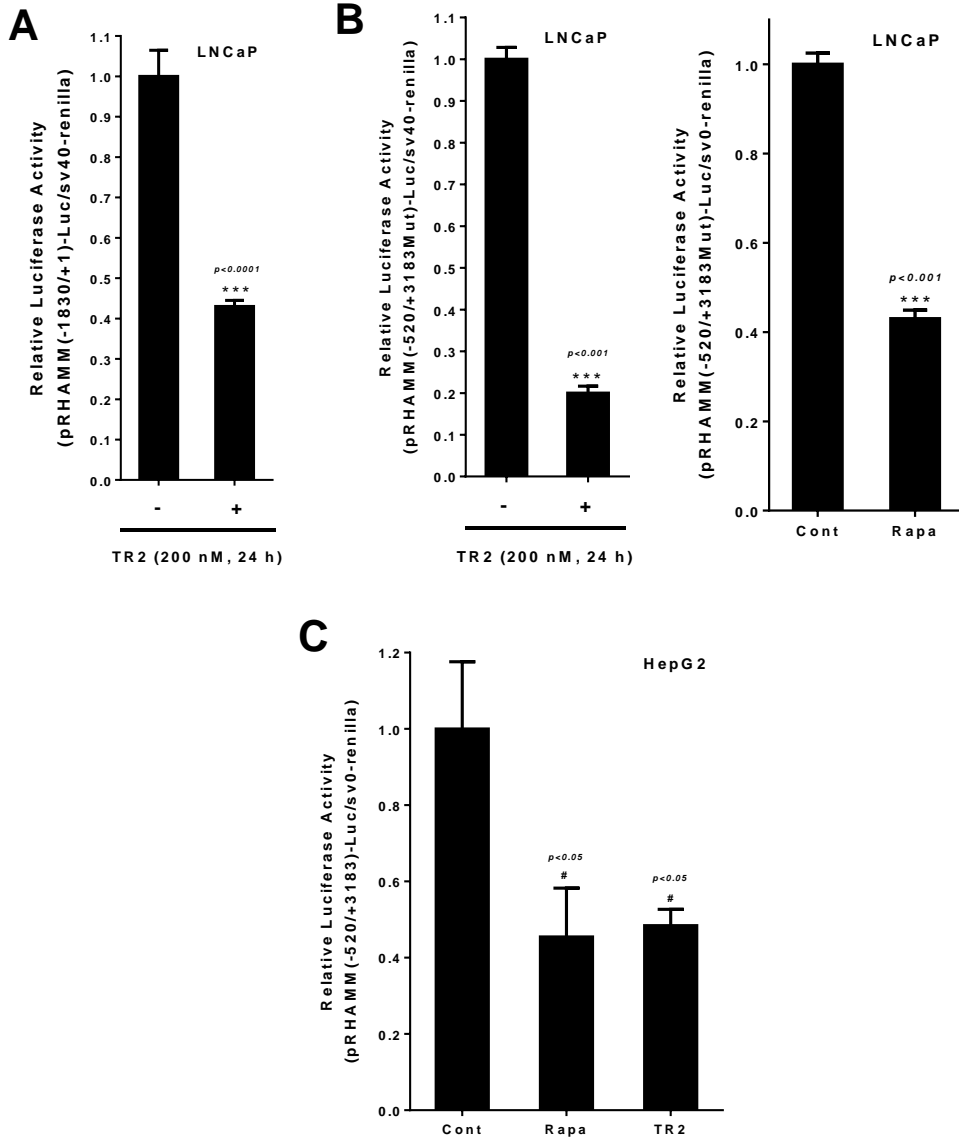

**Figure S1. mTOR activity is required HMMR transcription in human cancer cells**  
Cells were transfected with pRHAMM(-1830/+1)-luc (A), pRHAMM(-520/+3183mut)-luc (B) or pRHAMM(-520/+3183)-luc (C), and cmv-renilla, followed by treatment with mTOR inhibitors (TR2, Torin2; Rapa, Rapamycin) for 24 h. Data shown are relative values of firefly luciferase activity normalized to renilla luciferase. Data shown are the mean  $\pm$  SD of triplicate determinations and representative of two or three independent experiments (# $P < 0.05$ , \*\*\* $P < 0.001$  vs. control).
